# Supplementary material
Source: publisher site journal article supplement (https://static.cambridge.org/content/id/urn:cambridge.org:id:article:S0022112020001937/resource/name/S0022112020001937supp001.zip)
Supplement: Supplementary file 2 [file S0022112020001937supp001.zip]

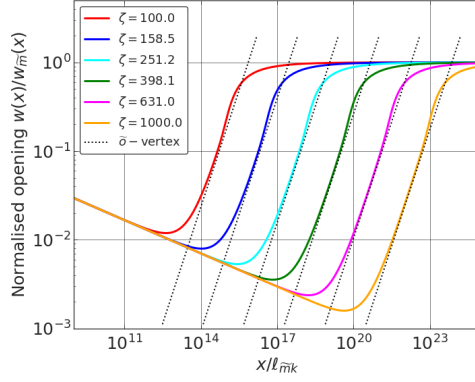

Figure 1: Zero-storage ( $\chi = \infty$ )  $\tilde{m}\tilde{o}k$ -face solution for the fracture opening normalised by  $\tilde{m}$ -vertex solution, as in figure 6b (left) of the main text, but for larger values of leak-in number  $\zeta$ . The intermediate  $\tilde{o}$  asymptote is shown by dotted lines.

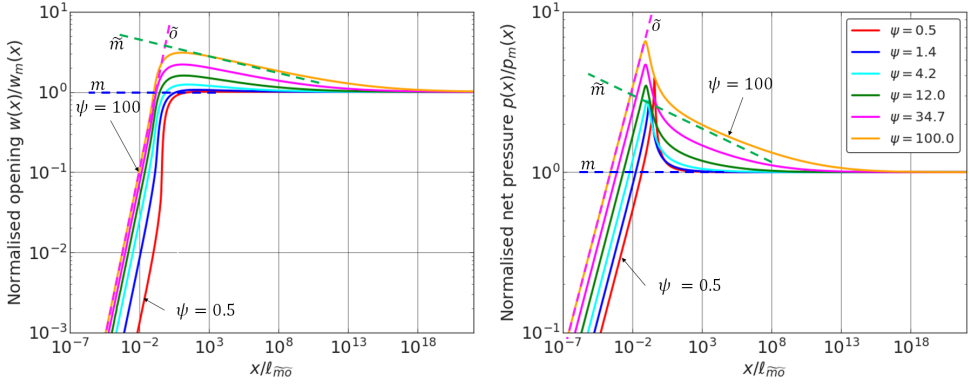

Figure 2: Zero-toughness ( $\chi = \infty$ )  $m\tilde{m}\tilde{o}$ -face solution normalised by the  $m$ -vertex solution from figure 7b of the main text shown in an extended coordinate range.
